1 **Conservation of conformational dynamics across prokaryotic actins**

2 Natalie Ng<sup>1</sup>, Handuo Shi<sup>1</sup>, Alexandre Colavin<sup>2</sup>, Kerwyn Casey Huang<sup>1,2,3,4,\*</sup>

3

4 <sup>1</sup>Department of Bioengineering, Stanford University, Stanford, CA 94305

5 <sup>2</sup>Biophysics Program, Stanford University, Stanford, CA 94305

6 <sup>3</sup>Department of Microbiology and Immunology, Stanford University School of

7 Medicine, Stanford, CA 94305

8 <sup>4</sup>Chan Zuckerberg Biohub, San Francisco, CA 94158

9

10 Short title: *Conformational dynamics of prokaryotic actins*

11

12 Keywords: *MreB, FtsA, ParM, crenactin, steered molecular dynamics, cytoskeleton, filament*

13 *mechanics*

14

15 \*Correspondence: [kchuang@stanford.edu](mailto:kchuang@stanford.edu)

16 **Abstract**

17

18 The actin family of cytoskeletal proteins is essential to the physiology of virtually all  
19 archaea, bacteria, and eukaryotes. While X-ray crystallography and electron microscopy  
20 have revealed structural homologies among actin-family proteins, these techniques  
21 cannot probe molecular-scale conformational dynamics. Here, we use all-atom  
22 molecular dynamic simulations to reveal conserved dynamical behaviors in four  
23 prokaryotic actin homologs: MreB, FtsA, ParM, and crenactin. We demonstrate that the  
24 majority of the conformational dynamics of prokaryotic actins can be explained by  
25 treating the four subdomains as rigid bodies. MreB, ParM, and FtsA monomers  
26 exhibited nucleotide-dependent dihedral and opening angles, while crenactin monomer  
27 dynamics were nucleotide-independent. We further determine that the opening angle of  
28 ParM is sensitive to a specific interaction between subdomains. Steered molecular  
29 dynamics simulations of MreB, FtsA, and crenactin dimers revealed that changes in  
30 subunit dihedral angle lead to intersubunit bending or twist, suggesting a conserved  
31 mechanism for regulating filament structure. Taken together, our results provide  
32 molecular-scale insights into the nucleotide and polymerization dependencies of the  
33 structure of prokaryotic actins, suggesting mechanisms for how these structural  
34 features are linked to their diverse functions.

35

36 **Significance Statement**

37 Simulations are a critical tool for uncovering the molecular mechanisms underlying  
38 biological form and function. Here, we use molecular-dynamics simulations to identify  
39 common and specific dynamical behaviors in four prokaryotic homologs of actin, a  
40 cytoskeletal protein that plays important roles in cellular structure and division in  
41 eukaryotes. Dihedral angles and opening angles in monomers of bacterial MreB, FtsA,  
42 and ParM were all sensitive to whether the subunit was bound to ATP or ADP, unlike  
43 in the archaeal homolog crenactin. In simulations of MreB, FtsA, and crenactin dimers,  
44 changes in subunit dihedral angle led to bending or twisting in filaments of these  
45 proteins, suggesting a mechanism for regulating the properties of large filaments. Taken  
46 together, our simulations set the stage for understanding and exploiting structure-  
47 function relationships of bacterial cytoskeletons.

48

## 49 **Introduction**

50           The eukaryotic cytoskeleton, which is critical for many cellular functions such as  
51 cargo transport and morphogenesis, is comprised of three major elements: actin,  
52 tubulin, and intermediate filaments. These proteins bind nucleotides and form highly  
53 dynamic polymers [1]. Each of these proteins has numerous homologs across the  
54 bacterial and archaeal kingdoms that dictate cell shape and various intracellular  
55 behaviors [1, 2]. However, relatively little is known about the structural dynamics of  
56 these prokaryotic homologs and whether dynamical behaviors are conserved.

57           Among bacterial cytoskeletal proteins, actin homologs are the most structurally  
58 and functionally diverse class identified thus far. Although sequence homology to  
59 eukaryotic actin is generally low, prokaryotic actins have been identified via X-ray  
60 crystallography based on their structural homology to eukaryotic actin [3-6], which has  
61 a U-shaped four-domain substructure, with two beta domains and a nucleotide binding  
62 pocket between two alpha domains [7]. Among the actin homologs, one of the best  
63 studied is MreB, which forms filaments that coordinate cell-wall synthesis in many rod-  
64 shaped bacteria and is essential for maintaining cell shape in these species [8, 9]. FtsA is  
65 an actin homolog with a unique structural domain swap that is essential for anchoring  
66 the key cell-division protein and tubulin homolog FtsZ to the membrane [5, 10]. The  
67 actin homolog ParM forms filaments that move R1 plasmids to opposite ends of rod-  
68 shaped bacteria prior to cytokinesis [11]. Crenactin forms part of the archaeal

69 cytoskeleton [12]; its biological function is currently unknown, but is hypothesized to be  
70 involved in DNA segregation and/or cell-shape control [12]. Given the common  
71 structural features of prokaryotic actins, it is unknown how they exert such a wide  
72 variety of functions. Features such as the domain swap in FtsA suggest that some  
73 proteins may have the capacity for unique intramonomeric conformational changes  
74 [13]. Another possibility is that functional differences emerge at the filament level: a  
75 wide variety of double-protofilament bacterial-actin filament structures have been  
76 observed [14, 15]. The extent to which lessons about structure-function relationships are  
77 general across the diverse actin family can be informed by understanding  
78 commonalities and distinctions in their structural dynamics.

79         While X-ray crystallography and cryo-electron microscopy (cryo-EM) have  
80 proven critical for elucidating the structures of monomers and filaments of prokaryotic  
81 actins, understanding the mechanisms by which these proteins exert their functions,  
82 particularly their mechanical roles, requires integration with other experimental and  
83 computational techniques. Microscopy has revealed that most actin homologs can form  
84 long filaments within cells [3, 4, 16-19]. *In vitro*, ParM filaments exhibit dynamic  
85 instability [20], and all actin homologs except FtsA have been observed to undergo  
86 nucleotide hydrolysis [12, 21, 22]. However, these experimental techniques lack the  
87 spatial and temporal resolution necessary to understand how these filament properties  
88 are linked to changes in structure.

89           Various mechanistic models of cytoskeletal function have focused on nucleotide  
90 hydrolysis as a key determinant of filament mechanics [23-25]. Understanding how  
91 nucleotide hydrolysis and polymerization affect structural transitions in prokaryotic  
92 actins requires a method that can interrogate molecular behaviors with atomic  
93 resolution. All-atom molecular dynamics (MD) simulations have been successfully  
94 employed to probe the effects of perturbations on prokaryotic and eukaryotic  
95 cytoskeletal proteins. MD simulations of eukaryotic actin monomers have uncovered  
96 nucleotide-dependent changes in the structure of the nucleotide-binding pocket [26],  
97 and simulations of actin filaments showed nucleotide-dependent changes to filament  
98 bending [27]. MD simulations predicted that GTP hydrolysis of the tubulin homolog  
99 FtsZ can result in substantial polymer bending [28], which was subsequently verified  
100 through X-ray crystallography [29]. MD simulations of MreB and FtsA filaments also  
101 revealed intra- and inter-subunit changes with important implications for their  
102 respective cellular functions [13, 17]. In sum, structural changes to cytoskeletal filaments  
103 are generally observable within the time frame accessible to MD simulations,  
104 potentiating a systematic survey of general and specific connections among bound  
105 nucleotide, polymerization, and subunit conformations across the prokaryotic actin  
106 family.

107           Here, we used MD simulations to probe the conformational dynamics of  
108 monomers and filaments of MreB, FtsA, ParM, and crenactin (Fig. 1). We found that

109 these proteins exhibit a wide range of intrasubunit motions that are generally well  
110 described by the centers-of-mass of their four subdomains, and hence the majority of  
111 monomer dynamics can be explained by changes in opening and dihedral angles  
112 formed by the subdomain centers. Our results predict that some proteins exhibit strong  
113 dependence on the bound nucleotide, while others are unaffected by hydrolysis. In  
114 ParM, opening is inhibited by interactions between two subdomains. As with MreB,  
115 changes in the dihedral angle of FtsA and crenactin subunits generally impact the  
116 bending or twisting of polymers. This work provides insight into how molecular-scale  
117 perturbations of these proteins contribute to their diverse roles in cell-shape regulation  
118 and intracellular organization across bacteria and archaea.

## 119 **Results**

120

121 *The nucleotide-dependent conformational dynamics of MreB are well represented by*  
122 *the centers of four subdomains*

123 In a previous study, we performed all-atom MD simulations on unconstrained MreB  
124 monomers using CHARMM27 force fields and found that ATP-bound monomers had  
125 larger opening and dihedral angle than ADP-bound monomers [13]. For our study of  
126 prokaryotic actins, we first sought to interrogate the robustness of these findings with  
127 respect to the force field used and the dimensional reduction to the centers-of-mass of  
128 subdomains IA, IB, IIA, and IIB of actin family members.

129 While simulations using different force fields mostly preserve large-scale  
130 motions, distinct behaviors emerge at finer levels of detail [30]. Thus, we performed all-  
131 atom MD simulations on *Thermatoga maritima* MreB (PDB ID: 1JCG) [4] using  
132 CHARMM36 force fields [31]. As done previously for actin [32] and MreB [28], we  
133 quantified conformational changes by calculating two opening angles and a dihedral  
134 angle from the center of mass of each of the four subdomains (Methods). While the  
135 opening angle was 5-10° smaller with CHARMM36 than with CHARMM27 [13] (Fig.  
136 2A,B, S1A), in both sets of simulations subdomains IB and IIB of ATP-bound monomers  
137 rapidly hinged apart to form stable, open conformations. Additionally, using  
138 CHARMM36, the opening angle equilibrated at smaller angles for ADP- than ATP-



139 bound MreB (Fig. S1B), as expected from our previous study [13]. ATP-bound MreB  
140 monomers also adopted a larger dihedral angle than ADP-bound monomers using  
141 CHARMM36, similar to CHARMM27 (Fig. 2C,D, Fig. S1C). Thus, despite small  
142 differences, a similar nucleotide dependence in the conformation of MreB monomers  
143 was observed using both CHARMM27 and CHARMM36 force fields, supporting our  
144 use of CHARMM36 going forward.

145         While previous studies used the centers-of-mass of the four subdomains of  
146 actin-family proteins to dramatically reduce the dimensionality of the protein structure  
147 [4, 13, 32], it is also possible for conformational changes to arise within subdomains in  
148 addition to the hinges between them. To distinguish between these scenarios, we  
149 calculated the root mean square deviation (RMSD) of the  $C_{\alpha}$  atoms from the  
150 energetically minimized structure for each subdomain separately, and also for the entire  
151 protein, at each time point of our simulations.

152         In the CHARMM27 ATP-bound simulation, the RMSD of the entire protein  
153 increased past 5 Å as the opening angle increased. However, the RMSD of each  
154 subdomain remained at ~2 Å (Fig. 2E), suggesting that most conformational changes  
155 were inter-subdomain. Unsurprisingly, since the CHARMM36 simulation adopted a  
156 smaller opening angle than the CHARMM27 simulation, the RMSD of the protein was  
157 smaller as well (Fig. 2F). Nonetheless, consistent with the CHARMM27 simulation, the  
158 RMSD of each subdomain was smaller than the RMSD of the whole protein (Fig. 2F). To

159 determine whether subdomain structure was consistent between distinct MreB  
160 monomer conformations, we computed RMSDs between the CHARMM36 equilibrium  
161 structure and the CHARMM27 simulation at each time point. Since the CHARMM27  
162 simulation adopted a larger opening angle than the CHARMM36 simulation, the RMSD  
163 of the whole protein increased relative to the CHARMM36 equilibrium structure. Still,  
164 the subdomain RMSDs remained at  $\sim 2$  Å (Fig. S1D). Thus, the structure of each  
165 subdomain is largely maintained as the whole protein undergoes large conformational  
166 changes.

167

### 168 *FtsA monomers exhibit nucleotide-dependent conformational changes*

169 We next investigated FtsA (PDB ID: 4A2B), an essential protein involved in tethering  
170 the key division protein FtsZ to the membrane [5, 10]. FtsA has a four-subdomain  
171 architecture similar to those of actin and MreB, but subdomain IB is replaced by a new  
172 subdomain (IC) located on the opposite side of subdomain IA (Fig. 1), that has no  
173 structural similarity to the actin subdomains [5]. To determine whether this domain  
174 swap impacts the conformational dynamics around the nucleotide-binding pocket and  
175 alters the coupling of dihedral/opening angles to nucleotide hydrolysis, we first carried  
176 out all-atom unconstrained MD simulations on ATP- and ADP-bound FtsA monomers.

177 While FtsA monomers showed little conformational flexibility, they still

178 exhibited distinct ATP- and ADP-bound states with respect to opening and dihedral

179 angles (Figure 3A,B, Methods). In all simulations, the RMSD of each subdomain as well  
180 as the entire protein remained  $<2 \text{ \AA}$  (Fig. S2), and the opening angle exhibited very little  
181 variation. Compared to an ATP-bound MreB monomer, whose opening angle reached a  
182 different equilibrium ( $102.1 \pm 2.4^\circ$  and  $93.2 \pm 1.0^\circ$ , mean  $\pm$  standard deviation (s.d.)  
183 measured over the final 30 ns of simulation) in replicate simulations, the opening angle  
184 of an ATP-bound FtsA monomer was much more constrained ( $109.7 \pm 0.8^\circ$  and  $109.6 \pm 0.8^\circ$   
185 in two replicates) and was highly reproducible (Fig. 3A,C,D). The FtsA equilibrium  
186 opening angle exhibited slight, but highly reproducible, nucleotide dependence: the  
187 opening angle for ADP-bound FtsA equilibrated at  $111.8 \pm 0.7^\circ$  and  $111.5 \pm 0.7^\circ$ . In ATP-  
188 and ADP-bound FtsA, the dihedral angle equilibrated at  $20.6 \pm 1.9^\circ$  for ATP and  $20.3 \pm 2.5^\circ$   
189 for ADP, respectively (Fig. 3E,F), with a highly reproducible mean value across  
190 simulations (Fig. 3F). Thus, as with MreB and actin, FtsA likely has two distinct states  
191 dependent on the bound nucleotide.

192

### 193 *ParM exhibits high conformational variability with nucleotide-dependent states*

194 We next used all-atom MD simulations to investigate ParM, which forms filaments that  
195 push apart plasmids to segregate them into daughter cells [6, 18]. Like MreB, ParM  
196 monomers exhibited large, nucleotide-dependent conformational changes, with  
197 substantial variability across replicate simulations. In all simulations of ATP-bound  
198 ParM, the opening angle rapidly increased from  $97^\circ$  in the crystal structure to over  $100^\circ$

199 (Fig. 4A). In one simulation, subdomains IB and IIB continued to hinge apart to  
200  $109.0 \pm 2.0^\circ$  after 100 ns. In the other two simulations, the opening angle equilibrated at  
201  $102.2 \pm 1.4^\circ$  and  $102.2 \pm 1.7^\circ$ . ADP-bound monomers were less open, equilibrating between  
202  $97^\circ$  and  $99^\circ$  (Fig. 4A). Unlike MreB, we did not observe consistent nucleotide  
203 dependencies on the dihedral angle of ParM monomers (Fig. S3).

204 In order to identify whether certain parts of ParM contributed to an opening  
205 angle of  $>105^\circ$  in one of the ATP-bound simulations, we calculated the RMSD of each  
206 subdomain and the whole protein relative to the minimized structure in that  
207 simulation. Subdomains IB and IIB exhibited large conformational variability, similar to  
208 the protein as a whole (Fig. 4B). We identified residues 35-45 and residues 58-67 on  
209 subdomain IB and residues 211-216 on subdomain IIB as having the greatest root mean  
210 square fluctuation (RMSF) (Fig. 4C), a measure of the positional variability of specific  
211 residues. The subdomain RMSDs calculated after removing these high-RMSF residues  
212 decreased to  $<2 \text{ \AA}$ , suggesting a stable core within each subdomain of ParM (Fig. 4D).  
213 We re-measured opening and dihedral angles excluding these high-RMSF residues, and  
214 found that while the initial values changed, the same nucleotide dependencies relating  
215 to dihedral and opening angle were observed (Fig. S4).

216 The high degree of variability in opening angle across replicate simulations  
217 suggested the opportunity to identify the structural elements that underlie ParM  
218 opening. In the crystal structure, the high RMSF loop of residues 58-67 interact strongly

219 (defined as a  $C_{\alpha}$ - $C_{\alpha}$  distance  $<5 \text{ \AA}$ ) with residues 173-174, which lie near the ATP  
220 binding pocket, as well as with residues 200-202 (Fig. 4E). In the ParM-ATP simulation  
221 with the largest opening angle, these interactions were largely abolished within 40 ns  
222 (Fig. 4E). By contrast, in the other two ParM-ATP simulations with smaller opening  
223 angles, the interaction between residues 58-67 and 173-174 persisted throughout the  
224 simulation (Fig. S5A,B). In one of these simulations, the interaction between residues 58-  
225 67 and 173-174 was initially disrupted but quickly recovered (Fig. S5A), consistent with  
226 the smaller increase in opening angle in this simulation. Across these three simulations,  
227 the opening angle was highly correlated with the distance between the center of mass of  
228 residues 65-67 and the center of mass of 173-174 (Fig. 4F).

229 To determine whether disrupting the interaction between residues 173-174 and  
230 58-67 would cause ParM to open, we steered the center-of-mass distance between  
231 residues 173-174 and 65-67 from the crystal structure value of  $9.3 \text{ \AA}$  to various larger  
232 values. In a steered simulation in which we steered the distance between residues 173-  
233 174 and 65-67 to  $19.3 \pm 1.0 \text{ \AA}$ , the opening angle increased to  $104.0 \pm 1.4^{\circ}$  (Fig. 4G),  
234 suggesting that breaking this interaction directly changes the ParM protein  
235 conformation. Steering the distance between residues 173-174 and 65-67 (Fig. 4G) to  
236  $19.1 \pm 0.8 \text{ \AA}$  and  $14.0 \pm 1.1 \text{ \AA}$  resulted in opening angles of  $101.9 \pm 2.0^{\circ}$  and  $98.6 \pm 1.0^{\circ}$ ,  
237 respectively, indicating that the distance between residues 173-174 and 65-67 tunes the  
238 opening angle of ParM monomers.

239           The dihedral angles of ParM in a monomer crystal structure [6] and in a cryo-EM  
240 filament structure [18] were  $26.7^\circ$  and  $7.54^\circ$ , respectively (Fig. 4H), suggesting that  
241 polymerization impacts ParM conformations. ParM forms left-handed double-helical  
242 filaments that make MD simulations infeasible due to the large number of subunits  
243 required to mimic a biologically relevant system. To overcome this challenge and to  
244 glean information about whether ParM filaments flatten upon polymerization, we  
245 steered the dihedral angle of an ATP-bound ParM monomer to  $7^\circ$  to match that of the  
246 cryo-EM filament structure. Upon release, the monomer rapidly unflattened to  $20^\circ$  (Fig.  
247 4I), suggesting that ParM monomers, like MreB [13], flatten upon polymerization. Thus,  
248 ParM likely has some similar conformational properties as MreB, even though the  
249 interactions between the flexible regions of subdomains IB and IIB unique to ParM  
250 provide tunability to its opening angle.

251

## 252 **The dihedral angle of prokaryotic actins is coupled to filament bending and twisting**

253 For MreB, we previously discovered that the dihedral angle of the bottom subunit in a  
254 dimer simulation was directly coupled to dimer bending [13]. In particular, the  
255 intersubunit bending of ATP-bound MreB was correlated to the dihedral angle  
256 throughout each simulation, and steering the dihedral angle to a flatter conformation  
257 reduced the bending of a dimer structure [13]. We confirmed these findings for the  
258 CHARMM36 force field by steering the dihedral angle of the bottom subunit of an

259 MreB-ATP dimer to 23.1°, 28.3°, and 33.0°, and observed the expected inverse  
260 relationship between dihedral angle and filament bending (Fig. S6). Given the  
261 similarities between the dynamics of MreB and other bacterial actin homologs at the  
262 monomeric level, we hypothesized that other actin-like filaments may also exhibit  
263 intersubunit behaviors coupled to intrasubunit changes.

264 We performed MD simulations of dimers of FtsA (PDB ID: 4A2B) and  
265 *Pyrobaculum calidifontis* crenactin (PDB ID: 4CJ7); crenactin is an archaeal actin homolog  
266 for which our MD simulations of ATP- and ADP-bound monomers exhibited similar  
267 conformations (Fig. S7A,B). Dimer structures were initialized from repeated subunits of  
268 the appropriate crystal structure. Due to ParM's complicated filament structure, which  
269 requires four points of contact per monomer, we were unable to construct biologically  
270 relevant ParM dimers with a stable interface *in silico* [33]. For each time step of dimer  
271 simulations, we measured two bending angles and one twisting angle between the  
272 subunits (Fig. 5A,D; Methods). We did not observe any significant nucleotide-  
273 dependent changes in bending or twisting angles for FtsA and crenactin dimers (Fig.  
274 S8), likely because there was either little or no nucleotide dependence in monomer  
275 conformations of FtsA (Fig. 3) and crenactin (Fig. S7).

276 Similar to MreB, the dihedral angle of the bottom subunit of an FtsA dimer was  
277 correlated with filament bending along the second bending axis (Fig. 5A,B). To test  
278 whether coupling between the dihedral angle and filament bending was direct, we

279 steered the dihedral angle of the bottom subunit to average values of  $16.4^\circ$ ,  $20.8^\circ$ ,  $25.5^\circ$ ,  
280 and  $29.6^\circ$  (measured over the last 20 ns of steered simulations; Fig. S9A). The resulting  
281 bending angles of the dimer shifted systematically with the dihedral angle (Fig. 5C),  
282 indicating that subunit dihedral changes drive bending of the FtsA filament.  
283 Interestingly, the bending angle flips from positive to negative (Fig. 5C); this flexibility  
284 could play a key role in regulating the transition of the division machinery from  
285 assembly to constriction.

286 In the crenactin filament crystal structure (PDB: 4CJ7), subunits have a large  
287 twisting angle of  $-47.3^\circ$  (negative indicates right-handed filament); in our simulations,  
288 both ATP- and ADP-bound dimers equilibrated between  $-45^\circ$  and  $-53^\circ$  (Fig. S8D),  
289 suggesting that the large twisting angle is not a result of strained crystal contacts. By  
290 contrast to MreB and FtsA, the dihedral angle of the bottom subunit of crenactin was  
291 not correlated with filament bending, but rather with filament twist (Fig. 5D,E). To test  
292 causality, we steered the dihedral angle of the bottom subunit to  $22.6^\circ$ ,  $23.4^\circ$ , and  $26.7^\circ$   
293 (Fig. S9B), and observed progressive increases in twist magnitude (Fig. 5F). In sum,  
294 coupling of filament degrees of freedom to subunit conformational changes is  
295 generalizable across at least some bacterial actin-family members.



## 296 **Discussion**

297 Through all-atom MD simulations of four actin-family proteins, we identified both  
298 conserved and specific dynamical behaviors across the actin family. First, we confirmed  
299 that the dihedral and opening angles between the centers-of-mass of the four  
300 subdomains represent the majority of conformational changes. In all simulated  
301 prokaryotic actins, the four subdomains exhibited high stability throughout the  
302 simulation, even as the whole protein changed conformation (Fig. 2E, 4B, S2, S7C). This  
303 analysis supports the model used by previous MD studies that measured dihedral and  
304 opening angles of actins [4, 13, 32], and provides a verified metric for future MD  
305 simulations of actin-family proteins.

306         Based on our findings, we propose a general model of the regulation of the  
307 structure of an actin-family filament in which the intra-subunit dihedral angle of a actin  
308 monomer regulates filament angles. The model suggests a mechanistic explanation for  
309 previous experimental results that have revealed variable filament structures for actin  
310 homologs. Electron microscopy of MreB, for instance, revealed straight filaments and  
311 arc-like filaments [6, 8]. Cryo-EM of crenactin filaments showed highly variable twists  
312 ranging from 32° to 56° [34]. Our simulations suggest that changes to bound-nucleotide  
313 state explain some of the variability in bend and twist for these dimers by tuning the  
314 dihedral angles of each subunit. Additionally, our finding that dihedral angle changes  
315 drive bending in FtsA and MreB but twisting in crenactin (Fig. 5, S6) indicate that the

316 mechanism is not a trivial mechanical consequence of the four subdomain structure of  
317 actin homologs. Instead, the coupling between dihedral angle and key filament angles  
318 has likely been tuned for alternative filament behaviors over evolutionary time scales.

319 We observed distinct behaviors across actin homologs in terms of nucleotide  
320 dependence. MreB and ParM monomers exhibited distinct nucleotide-dependent states  
321 (Fig. 2A-D, 4A). These monomers have been shown to have ATPase activity [21, 35],  
322 suggesting that structural changes occur during the hydrolysis of ATP. Our results are  
323 also synergistic with efforts to translate the conformational variability of bacterial actin  
324 homologs for engineered purposes, including using ParM as a biosensor for ADP [36].  
325 Numerous studies have attempted to detect ATPase activity in FtsA, but have found  
326 little or no activity [22, 37, 38]. Our simulations visualized distinct and reproducible  
327 nucleotide-dependent states (Fig. 3). Similar to our previous observation that the  
328 bending axis of an FtsA dimer rapidly changes upon release from crystal contacts [17],  
329 there is likely flexibility in the conformation of FtsA subunits that is masked in X-ray  
330 crystallography by symmetry requirements. For crenactin, we did not observe  
331 nucleotide dependence in monomer conformation in our simulations, all of which were  
332 carried out at 37 °C (Fig. S7). Crenactin has little ATPase activity at 37 °C, with  
333 maximum ATPase activity at 90 °C, which is far outside the temperature range for  
334 simulations with CHARMM force fields [12]. Thus, it remains to be seen whether  
335 crenactin behaves more like MreB/ParM or FtsA in its native environmental conditions

336 of thermophilic temperatures. Hsp70, which forms a superfamily with actin based on a  
337 common fold, also exhibits nucleotide-dependent allostery [39], indicating that these  
338 intramonomeric changes may be general to a larger group of proteins. This basis for the  
339 large intramonomeric conformational changes in proteins such as MreB and ParM also  
340 suggests a strategy for the future design of proteins with similar flexibility and for the  
341 design of antibiotics that inhibit or disrupt these motions.

342 For prokaryotic actins, small perturbations in the protein's environment can  
343 vastly impact structure. Many prokaryotic actins require binding proteins to confer  
344 their function *in vivo*, such as RodZ binding to MreB [40, 41]. Further, simulations of  
345 FtsA-FtsZ complexes could reveal why cell division relies upon the correct ratio of FtsA  
346 and FtsZ [42]. Crystal structures of FtsA-FtsZ complexes exist, but as we have shown  
347 with FtsA, crystal structures do not necessary capture the relevant physiological state  
348 [5], motivating the use of complementary techniques such as MD. In addition, genetic  
349 perturbations to prokaryotic actins can significantly impact cellular phenotypes. For  
350 example, mutations in MreB can have large effects on cell size and shape as well as  
351 MreB's ability to sense curvature [43, 44]. Certain ParM mutations restrict the formation  
352 of helical filaments [45], and a variety of FtsA mutations restore viability after *zipA*  
353 deletion and alter cell shape [46-48]. Ultimately, crystallography, cryo-EM, *in vivo* light  
354 microscopy, and MD should prove a powerful combination for understanding and  
355 exploiting the numerous functions of cytoskeletal proteins.

356 **Methods**

357

358 *MD simulations*

359 All simulations (Table S1) were performed using the molecular dynamics package  
360 NAMD v. 2.10 [49] with the CHARMM36 force field [31], except where otherwise noted,  
361 including CMAP corrections [50]. Water molecules were described with the TIP3P  
362 model [51]. Long-range electrostatic forces were evaluated by means of the particle-  
363 mesh Ewald summation approach with a grid spacing of  $<1 \text{ \AA}$ . An integration time step  
364 of 2 fs was used [52]. Bonded terms and short-range, non-bonded terms were evaluated  
365 every time step, and long-range electrostatics were evaluated every other time step.  
366 Constant temperature ( $T = 310 \text{ K}$ ) was maintained using Langevin dynamics [53], with a  
367 damping coefficient of  $1.0 \text{ ps}^{-1}$ . A constant pressure of 1 atm was enforced using the  
368 Langevin piston algorithm [54] with a decay period of 200 fs and a time constant of 50  
369 fs. Setup, analysis, and rendering of the simulation systems were performed with the  
370 software VMD v. 1.9.2 [55]. Steering of the dihedral angle and of distances between  
371 residues was achieved by introducing collective forces to constrain angles and distances  
372 to defined values through the collective variable functionality of NAMD [49].

373

374 *Simulated systems*

375 MD simulations performed in this study are described in Table S1. For simulated  
376 systems initialized from a MreB crystal structure, the crystallographic structure of *T.*  
377 *maratima* MreB bound to AMP-PMP (PDB ID: 1JCG) [4] was used; for FtsA, the  
378 crystallographic structure of *T. maratima* FtsA bound to ATP gamma A (PDB ID: 4A2B)  
379 [5] was used; for ParM, the crystallographic structure of *E. coli* ParM (PDB ID: 1MWM)  
380 [6] bound to ADP was used; for crenactin, the crystallographic structure of *P. calidifontis*  
381 crenactin bound to ADP (PDB ID: 4CJ7) [12] was used. The bound nucleotide was  
382 replaced by both ATP and ADP for all simulated systems, and Mg<sup>2+</sup>-chelating ions were  
383 added for stability. Water and neutralizing ions were added around each monomer or  
384 dimer, resulting in final simulation sizes of up to 157,000 atoms. All unconstrained  
385 simulations were run for 54-134 ns. All steered simulations were run until equilibrium  
386 was reached. For mean values and distributions of measurements, only the last 30 ns of  
387 unconstrained simulations or the last 20 ns of steered simulations were used. To ensure  
388 simulations had reached equilibrium, measurement distributions were fit to a Gaussian.

389

### 390 *Analysis of dihedral and opening angles*

391 The centers-of-mass of the four subdomains of each protein were obtained using VMD.  
392 For each time step, we calculated one opening angle from the dot product between the  
393 vector defined by the centers-of-mass of subdomains IIA and IIB and the vector defined  
394 by the centers-of-mass of subdomains IA and IB (or IC for FtsA). Similarly, we

395 calculated a second opening angle from the dot products between the vectors defined  
396 by the centers-of-mass of subdomains IA and IB and of subdomains IIA and IA. The  
397 opening angles we report are the average of these two opening angles. The dihedral  
398 angle was defined as the angle between the vector normal to a plane defined by  
399 subdomains IA, IB, and IIA and the vector normal to a plane defined by subdomains  
400 IIB, IIA, and IA. Subdomain definitions for each protein are provided in Table S2.

401

#### 402 *Analysis of bending and twisting angles*

403 At each time step of a dimer simulation, the coordinate system of the bottom and top  
404 monomers was defined using three unit vectors  $\{\mathbf{d}_1, \mathbf{d}_2, \mathbf{d}_3\}$ .  $\mathbf{d}_1$  approximately aligns to  
405 the center-of-mass between the two subunits, and  $\mathbf{d}_3$  is defined to be zero at the start of  
406 the simulation. Rotation around  $\mathbf{d}_1$  represents twist between the bottom and top  
407 subunits. Since  $\mathbf{d}_3$  is defined to be zero at the start of the simulation,  $\mathbf{d}_2$  represents the  
408 ideal bending axis.  $\mathbf{d}_3$  represents bending in a direction orthogonal to  $\mathbf{d}_2$ .

409 **Supplementary Tables**

410 **Table S1: MD simulations in this study.**

| Name                 | PDB structure | Ligand                   | Atoms (×1000) | Condition     | Time (ns) |
|----------------------|---------------|--------------------------|---------------|---------------|-----------|
| 1-MreB-ATP-MG        | 1JCG monomer  | ATP and Mg <sup>2+</sup> | 71.8          | Unconstrained | 75.9      |
| 1-MreB-ATP-MG-2      | 1JCG monomer  | ATP and Mg <sup>2+</sup> | 71.8          | Unconstrained | 63.9      |
| 1-MreB-ADP-MG        | 1JCG monomer  | ADP and Mg <sup>2+</sup> | 71.8          | Unconstrained | 75.2      |
| 1-FtsA-ATP-MG        | 4A2B monomer  | ATP and Mg <sup>2+</sup> | 87.2          | Unconstrained | 58.1      |
| 1-FtsA-ATP-MG-2      | 4A2B monomer  | ATP and Mg <sup>2+</sup> | 87.2          | Unconstrained | 57.6      |
| 1-FtsA-ADP-MG        | 4A2B monomer  | ADP and Mg <sup>2+</sup> | 87.2          | Unconstrained | 58.2      |
| 1-FtsA-ADP-MG-2      | 4A2B monomer  | ADP and Mg <sup>2+</sup> | 87.2          | Unconstrained | 54        |
| 1-ParM-ATP-MG        | 1MWM monomer  | ATP and Mg <sup>2+</sup> | 70.6          | Unconstrained | 134.3     |
| 1-ParM-ATP-MG-2      | 1MWM monomer  | ATP and Mg <sup>2+</sup> | 70.6          | Unconstrained | 86.1      |
| 1-ParM-ATP-MG-3      | 1MWM monomer  | ATP and Mg <sup>2+</sup> | 70.6          | Unconstrained | 67.4      |
| 1-ParM-ADP-MG        | 1MWM monomer  | ADP and Mg <sup>2+</sup> | 70.6          | Unconstrained | 132.7     |
| 1-ParM-ADP-MG-2      | 1MWM monomer  | ADP and Mg <sup>2+</sup> | 70.6          | Unconstrained | 82.1      |
| 1-Crenactin-ATP-MG   | 4CJ7 monomer  | ATP and Mg <sup>2+</sup> | 80.0          | Unconstrained | 80.6      |
| 1-Crenactin-ATP-MG-2 | 4CJ7 monomer  | ATP and Mg <sup>2+</sup> | 80.0          | Unconstrained | 65.6      |
| 1-Crenactin-ADP-MG   | 4CJ7 monomer  | ADP and Mg <sup>2+</sup> | 80.0          | Unconstrained | 92.9      |
| 1-Crenactin-ADP-MG-2 | 4CJ7 monomer  | ADP and Mg <sup>2+</sup> | 80.0          | Unconstrained | 64.6      |
| 2-FtsA-ATP-          | 4A2B dimer    | ATP and                  | 116.5         | Unconstrained | 105.2     |

| MG                                |              | Mg <sup>2+</sup>         |       |               |       |
|-----------------------------------|--------------|--------------------------|-------|---------------|-------|
| 2-FtsA-ATP-MG-2                   | 4A2B dimer   | ATP and Mg <sup>2+</sup> | 116.5 | Unconstrained | 82.5  |
| 2-FtsA-ADP-MG                     | 4A2B dimer   | ADP and Mg <sup>2+</sup> | 116.5 | Unconstrained | 102.9 |
| 2-FtsA-ADP-MG-2                   | 4A2B dimer   | ADP and Mg <sup>2+</sup> | 116.5 | Unconstrained | 87.0  |
| 2-Crenactin-ATP-MG                | 4CJ7 dimer   | ATP and Mg <sup>2+</sup> | 157.9 | Unconstrained | 98.0  |
| 2-Crenactin-ATP-MG-2              | 4CJ7 dimer   | ATP and Mg <sup>2+</sup> | 157.9 | Unconstrained | 67.2  |
| 2-Crenactin-ADP-MG                | 4CJ7 dimer   | ADP and Mg <sup>2+</sup> | 157.9 | Unconstrained | 99.1  |
| 2-Crenactin-ADP-MG-2              | 4CJ7 dimer   | ADP and Mg <sup>2+</sup> | 157.9 | Unconstrained | 61.2  |
| 1-ParM-ATP $\Phi=7^\circ$         | 1MWM monomer | ATP and Mg <sup>2+</sup> | 70.6  | Steered       | 32.7  |
| 2-MreB-ATP $\Phi=13.0^\circ$      | 1JCG dimer   | ATP and Mg <sup>2+</sup> | 107.8 | Steered       | 11.6  |
| 2-MreB-ATP $\Phi=17.6^\circ$      | 1JCG dimer   | ATP and Mg <sup>2+</sup> | 107.8 | Steered       | 10.9  |
| 2-MreB-ATP $\Phi=22.6^\circ$      | 1JCG dimer   | ATP and Mg <sup>2+</sup> | 107.8 | Steered       | 9.2   |
| 2-MreB-ATP $\Phi=28.1^\circ$      | 1JCG dimer   | ATP and Mg <sup>2+</sup> | 107.8 | Steered       | 11.4  |
| 2-MreB-ATP $\Phi=32.5^\circ$      | 1JCG dimer   | ATP and Mg <sup>2+</sup> | 107.8 | Steered       | 10.5  |
| 2-FtsA-ATP $\Phi=16.3^\circ$      | 4A2B dimer   | ADP and Mg <sup>2+</sup> | 116.5 | Steered       | 18.4  |
| 2-FtsA-ATP $\Phi=20.8^\circ$      | 4A2B dimer   | ADP and Mg <sup>2+</sup> | 116.5 | Steered       | 18.5  |
| 2-FtsA-ATP $\Phi=25.3^\circ$      | 4A2B dimer   | ADP and Mg <sup>2+</sup> | 116.5 | Steered       | 18.5  |
| 2-FtsA-ATP $\Phi=29.5^\circ$      | 4A2B dimer   | ADP and Mg <sup>2+</sup> | 116.5 | Steered       | 18.4  |
| 2-Crenactin-ATP $\Phi=22.8^\circ$ | 4CJ7 dimer   | ADP and Mg <sup>2+</sup> | 157.9 | Steered       | 24.1  |
| 2-Crenactin-ATP $\Phi=26.7^\circ$ | 4CJ7 dimer   | ADP and Mg <sup>2+</sup> | 157.9 | Steered       | 23.5  |



|                                      |              |                          |       |         |      |
|--------------------------------------|--------------|--------------------------|-------|---------|------|
| 2-Crenactin-ATP $\varphi=31.2^\circ$ | 4CJ7 dimer   | ADP and Mg <sup>2+</sup> | 157.9 | Steered | 24.1 |
| 1-ParM-ATP $d=19.3 \text{ \AA}$      | 1MWM monomer | ATP and Mg <sup>2+</sup> | 70.6  | Steered | 27.3 |
| 1-ParM-ATP $d=19.0 \text{ \AA}$      | 1MWM monomer | ATP and Mg <sup>2+</sup> | 70.6  | Steered | 22.3 |
| 1-ParM-ATP $d=14.0 \text{ \AA}$      | 1MWM monomer | ATP and Mg <sup>2+</sup> | 70.6  | Steered | 30.5 |

411

412 **Table S2: Subdomain definitions by residue numbers.**

| Protein   | Structure    | IA                        | IB                | IIA                 | IIB     | IC     |
|-----------|--------------|---------------------------|-------------------|---------------------|---------|--------|
| MreB      | 1JCG monomer | 1-138; 315-336            | 30-72             | 139-175;<br>251-314 | 176-249 | N/A    |
| FtsA      | 4A2B monomer | 1-86; 167-198;<br>360-392 | N/A               | 199-234;<br>305-359 | 235-304 | 87-166 |
| ParM      | 1MWM monomer | 1-29, 68-159;<br>306-320  | 30-67;<br>130-137 | 160-198;<br>255-305 | 199-254 | N/A    |
| Crenactin | 4CJ7 monomer | 1-38; 119-173;<br>399-432 | 39-118            | 174-207;<br>300-398 | 208-194 | N/A    |

413

414 **Acknowledgments**

415 We thank Jen Hsin and the Huang lab for helpful discussions. Funding was provided  
416 by NSF CAREER Award MCB-1149328, the Stanford Center for Systems Biology under  
417 Grant P50-GM107615, and the Allen Discovery Center at Stanford on Systems Modeling  
418 of Infection (to K.C.H.); an Agilent Fellowship and a Stanford Interdisciplinary Graduate  
419 Fellowship (to H.S.); and a Stanford Graduate Fellowship and a Gerald J. Lieberman  
420 Fellowship (to A.C.). N.N. was supported by the Stanford Bioengineering Research  
421 Experience for Undergraduates program. K.C.H. is a Chan Zuckerberg Investigator. All  
422 simulations were performed with computer time provided by the Extreme Science and  
423 Engineering Discovery Environment (XSEDE), which is supported by National Science  
424 Foundation grant number OCI-1053575, with allocation number TG-MCB110056 (to  
425 K.C.H.). This work was also supported in part by the National Science Foundation  
426 under grant PHYS-1066293 and the hospitality of the Aspen Center for Physics.

427 **Figure Legends**

428

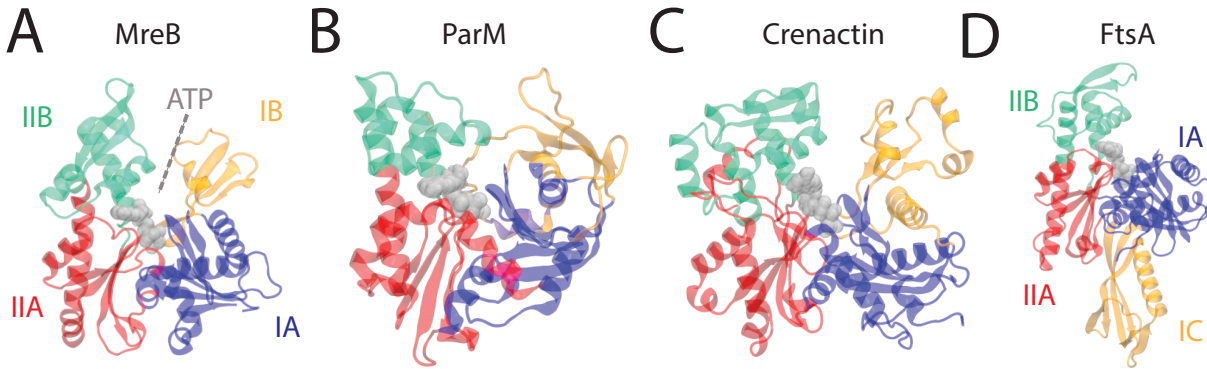

429

430 **Figure 1: Structures of prokaryotic actin homologs.**

431 A-C) The crystal structures of (A) MreB (PDB ID: 1JCG), (B) ParM (PDB ID: 1MWM),  
432 and (C) crenactin (PDB ID: 4CJ7) display a characteristic U-shaped actin-like fold  
433 described by four subdomains surrounding an enclosed ATP-binding pocket (gray).

434 D) The crystal structure of FtsA (PDB ID: 4A2B) shows a domain swap of IB to IC.

435

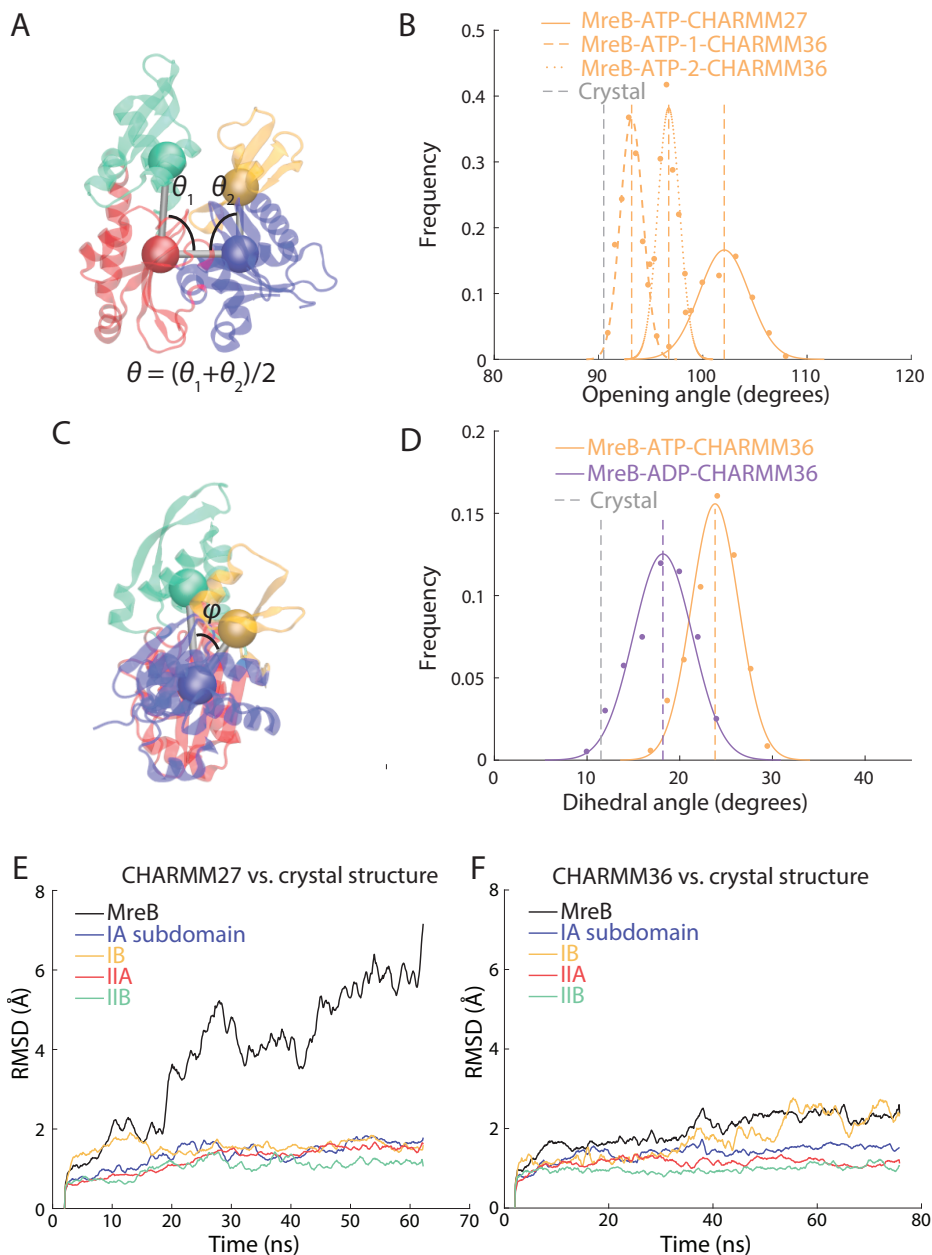

436

437 **Figure 2: MreB adopts multiple conformations with nucleotide-dependent opening**  
438 **and dihedral angles.**

439 A) The opening angle of an MreB monomer is defined as the average of the internal  
440 opening angles.

441 B) The opening angle distribution in the last 30 ns of simulation is larger for ATP-  
442 bound than ATP-bound MreB monomers. The opening angle of an ATP-bound  
443 MreB monomer equilibrated at an even larger value in a CHARMM27  
444 simulation. The rest of the simulations in this manuscript use CHARMM36 force  
445 fields, unless otherwise noted. Dashed lines are mean values. Gray dashed line is  
446 value in crystal structure.

447 C) Schematic illustrating calculation of the dihedral angle.

448 D) Histograms of the dihedral angle during the last 30 ns of the simulations show  
449 that an ATP-bound MreB monomer adopts a larger dihedral angle than an ADP-  
450 bound MreB monomer. Dashed lines are mean values. Gray dashed line is value  
451 in crystal structure.

452 E) The trajectory of the RMSD values of the MreB-ATP monomer in a CHARMM27  
453 simulation relative to the initial equilibrated structure exhibited large changes as  
454 the protein adopted an open conformation (black line). Nonetheless, the RMSDs  
455 of the four subdomains remained  $\sim 2$  Å, indicating that conformational dynamics  
456 were small within each subdomain.

457 F) The RMSD of the entire protein computed from the trajectory of for the  
458 CHARMM36 MreB-ATP-1 simulation relative to the initial equilibrated structure  
459 remained relatively low compared with (E). The RMSDs of the four subdomains  
460 remained  $\sim 2$  Å.

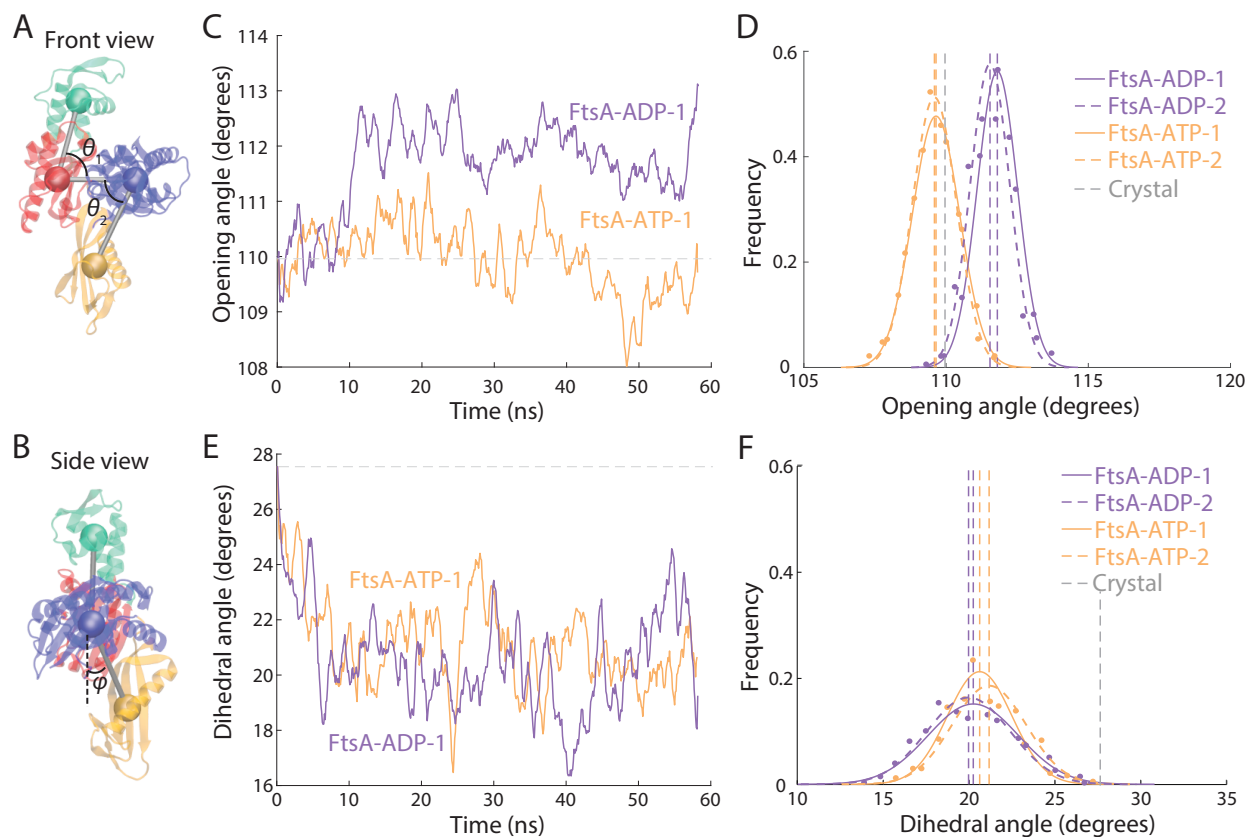

461

462 **Figure 3: FtsA monomers undergo small but reproducible changes in opening angle**  
463 **upon nucleotide hydrolysis.**

464 A) The domain swap of IB to IC in FtsA necessitated a change in the calculation  
465 methodology for opening angle (Methods).

466 B) Schematic of calculation methodology for FtsA dihedral angle.

467 C) The opening angle of an ATP-bound FtsA monomer remained centered on the  
468 value in the crystal structure (gray dashed line), while an ADP-bound FtsA  
469 monomer equilibrated at a slightly larger opening angle.

470 D) The distributions of opening angles over the last 30 ns of simulation were highly  
471 reproducible across the two replicate simulations for ATP- and ADP-bound FtsA

472 monomers. Dashed lines are mean values. Gray dashed line is the value in the  
473 crystal structure.

474 E,F) The trajectories (E) and distributions (F) of dihedral angles of ATP- and ADP-  
475 bound FtsA monomers were similar. Dashed lines are mean values. Gray dashed  
476 line is the value in the crystal structure.

477

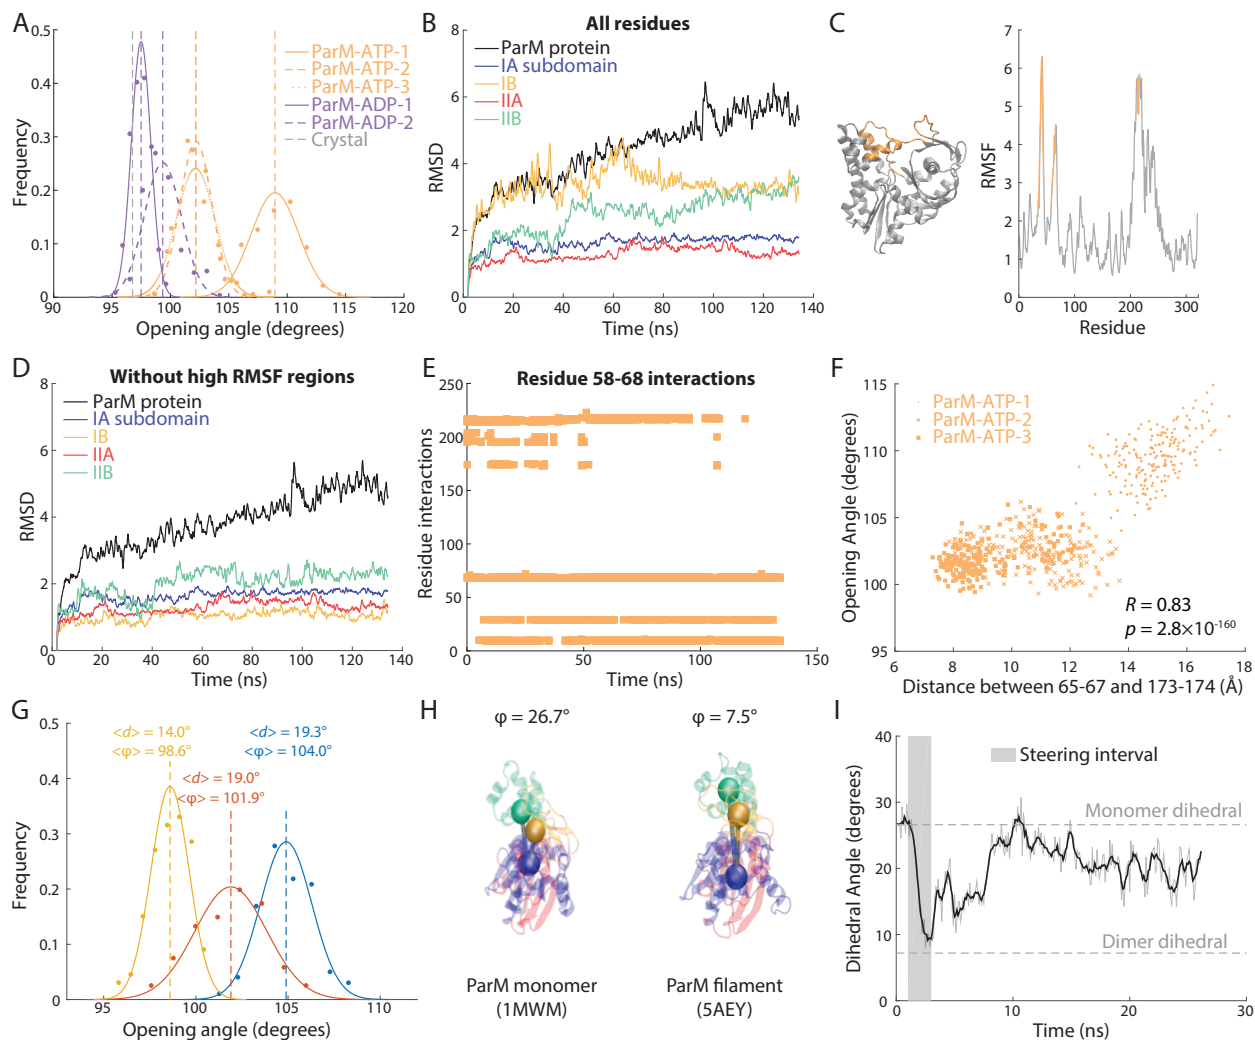

478

479 **Figure 4: Loop in the IB domain drives ParM monomer opening.**

480 A) The opening angle of ADP-bound ParM monomers remained near the crystal  
 481 structure value (gray dashed line), while that of ATP-bound ParM monomers  
 482 consistently increased, with two simulations equilibrating between 100° and 104°  
 483 and another opening beyond 105°. Dashed lines are mean values. Gray dashed  
 484 line is the value in the crystal structure.



- 485 B) For the ATP-bound ParM simulation in which the opening angle increased  
486 beyond  $105^\circ$  (ParM-ATP-1), there were large increases in RMSD across the entire  
487 protein and in subdomains IIA and IIB.
- 488 C) RMSF analysis of single residue fluctuations during the simulation in (B)  
489 revealed two regions (residues 58-67 and 173-174, gold) with high RMSF values  
490 that were spatially proximal on the crystal structure.
- 491 D) For the simulation in (B), when ignoring residues 58-67 and 173-174, the RMSDs  
492 of all four subdomains dropped to  $\sim 2 \text{ \AA}$ . Thus, these regions were responsible for  
493 the conformational variability in (B).
- 494 E) Interactions of the loop formed by residues 58-67 with residues 173-174 and 200-  
495 202 (blue boxes) disappeared early in simulation ParM-ATP-1. Interactions were  
496 defined as a minimum distance between residues of  $< 5 \text{ \AA}$ .
- 497 F) The distance ( $d$ ) between residues 58-67 and 173-174 was highly correlated with  
498 the opening angle ( $\varphi$ ) across all simulations of ParM-ATP monomers.
- 499 G) Steering of the distance between residues 58-67 and 173-174 tuned the opening  
500 angle in a distance-dependent manner. Dashed lines are mean values.
- 501 H) The dihedral angle of a ParM monomer crystal structure (PDB ID: 1MWM) was  
502 much higher than that of each subunit in a ParM filament crystal structure (PDB  
503 ID: 5AEY).

504 I) When the dihedral angle of a ParM-ATP monomer was steered to  $7.5^\circ$  (gray box)

505 and then released, the angle re-equilibrated at a value similar to unconstrained

506 simulations (Fig. 4A), indicating that ParM flattens upon polymerization.

507

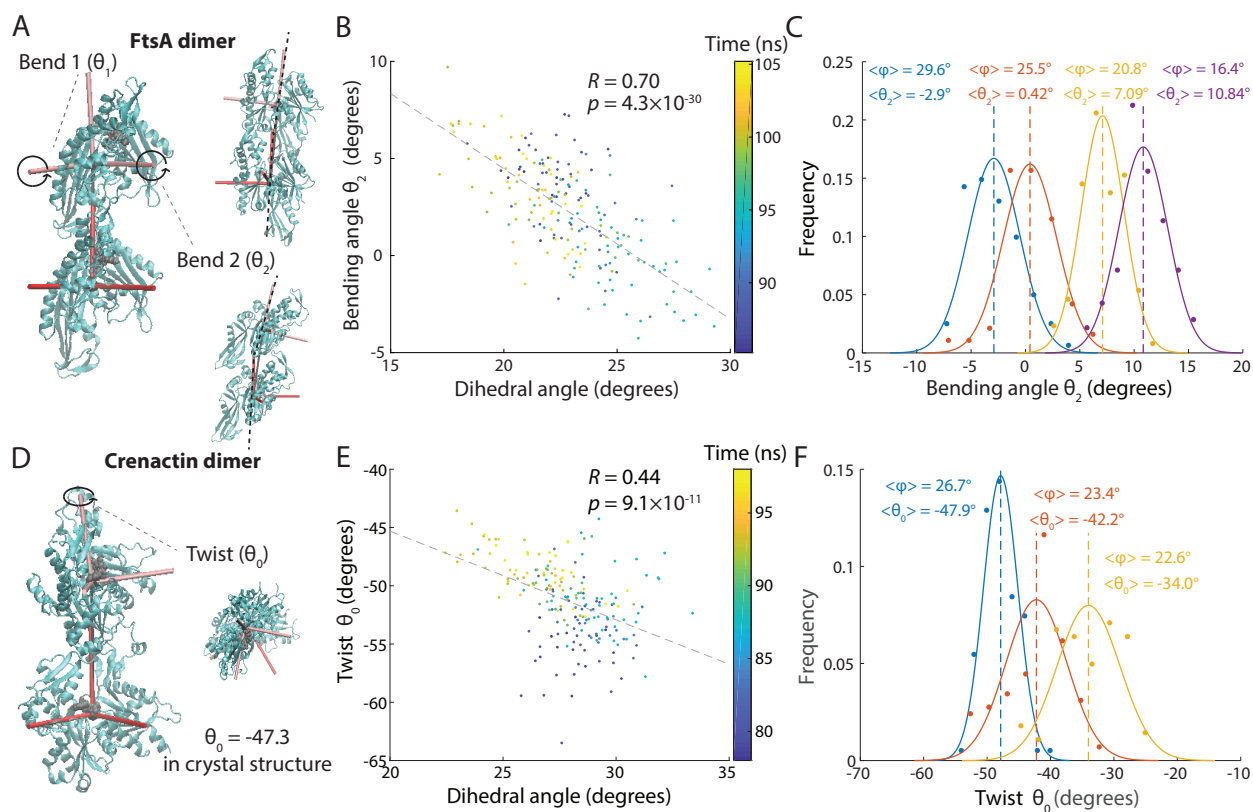

508

509 **Figure 5: FtsA and crenactin filament bending and twisting are driven by changes to**  
510 **subunit dihedral angles.**

511 A) Illustration of the two possible axes for FtsA dimer bending.

512 B) The dihedral angle of the bottom subunit in an FtsA-ATP dimer was highly  
513 correlated with bending angle  $\theta_2$  in all unconstrained simulations.

514 C) Steering the dihedral angle ( $\varphi$ ) of the bottom subunit of an FtsA-ATP dimer from  
515  $16.4^\circ$  to  $29.6^\circ$  caused systematic increases in the bending angle  $\theta_2$ . Curves are  
516 Gaussian fits to the data. Dashed lines are mean values.

517 D) Illustration of the large degree of twist in a crenactin dimer.

518 E) The dihedral angle ( $\varphi$ ) of the bottom subunit in a crenactin-ATP dimer was  
519 highly correlated with dimer twist in unconstrained simulations.

520 F) Steering the dihedral angle of the bottom subunit of a crenactin-ATP dimer from  
521  $22.6^\circ$  to  $26.7^\circ$  caused a systematic increase in dimer twist. Curves are Gaussian  
522 fits to the data. Dashed lines are mean values.

523

524 **References**

525

- 526 1. Fletcher, D.A. and R.D. Mullins, *Cell mechanics and the cytoskeleton*. Nature, 2010.  
527 **463**(7280): p. 485-92.
- 528 2. Shih, Y.L. and L. Rothfield, *The bacterial cytoskeleton*. Microbiol Mol Biol Rev,  
529 2006. **70**(3): p. 729-54.
- 530 3. Izore, T., et al., *Crenactin from Pyrobaculum calidifontis is closely related to actin in*  
531 *structure and forms steep helical filaments*. FEBS Lett, 2014. **588**(5): p. 776-82.
- 532 4. van den Ent, F., L.A. Amos, and J. Lowe, *Prokaryotic origin of the actin cytoskeleton*.  
533 Nature, 2001. **413**(6851): p. 39-44.
- 534 5. van den Ent, F. and J. Löwe, *Crystal structure of the cell division protein FtsA from*  
535 *Thermotoga maritima*. The EMBO Journal, 2000. **19**(20): p. 5300-5307.
- 536 6. van den Ent, F., et al., *F-actin-like filaments formed by plasmid segregation protein*  
537 *ParM*. EMBO J, 2002. **21**(24): p. 6935-43.
- 538 7. Kabsch, W. and K.C. Holmes, *The actin fold*. FASEB J, 1995. **9**(2): p. 167-74.
- 539 8. Esue, O., et al., *The assembly of MreB, a prokaryotic homolog of actin*. J Biol Chem,  
540 2005. **280**(4): p. 2628-35.
- 541 9. Shaevitz, J.W. and Z. Gitai, *The structure and function of bacterial actin homologs*.  
542 Cold Spring Harb Perspect Biol, 2010. **2**(9): p. a000364.

- 543 10. Pichoff, S. and J. Lutkenhaus, *Unique and overlapping roles for ZipA and FtsA in*  
544 *septal ring assembly in Escherichia coli*. EMBO J, 2002. **21**(4): p. 685-93.
- 545 11. Jensen, R.B. and K. Gerdes, *Mechanism of DNA segregation in prokaryotes: ParM*  
546 *partitioning protein of plasmid R1 co-localizes with its replicon during the cell cycle*.  
547 EMBO J, 1999. **18**(14): p. 4076-84.
- 548 12. Ettema, T.J., A.C. Lindas, and R. Bernander, *An actin-based cytoskeleton in archaea*.  
549 Mol Microbiol, 2011. **80**(4): p. 1052-61.
- 550 13. Colavin, A., J. Hsin, and K.C. Huang, *Effects of polymerization and nucleotide*  
551 *identity on the conformational dynamics of the bacterial actin homolog MreB*.  
552 Proceedings of the National Academy of Sciences, 2014. **111**(9): p. 3585-3590.
- 553 14. Polka, J.K., et al., *The structure and assembly dynamics of plasmid actin AlfA imply a*  
554 *novel mechanism of DNA segregation*. J Bacteriol, 2009. **191**(20): p. 6219-30.
- 555 15. van den Ent, F., et al., *Bacterial actin MreB forms antiparallel double filaments*. Elife,  
556 2014. **3**: p. e02634.
- 557 16. Jones, L.J., R. Carballido-Lopez, and J. Errington, *Control of cell shape in bacteria:*  
558 *helical, actin-like filaments in Bacillus subtilis*. Cell, 2001. **104**(6): p. 913-22.
- 559 17. Hsin, J., R. Fu, and K.C. Huang, *Dimer dynamics and filament organization of the*  
560 *bacterial cell division protein FtsA*. J Mol Biol, 2013. **425**(22): p. 4415-26.
- 561 18. Bharat, T.A., et al., *Structures of actin-like ParM filaments show architecture of*  
562 *plasmid-segregating spindles*. Nature, 2015. **523**(7558): p. 106-10.

- 563 19. Bergeron, J.R., et al., *Structure of the magnetosome-associated actin-like MamK*  
564 *filament at subnanometer resolution*. Protein Sci, 2017. **26**(1): p. 93-102.
- 565 20. Galkin, V.E., et al., *Structural polymorphism of the ParM filament and dynamic*  
566 *instability*. Structure, 2009. **17**(9): p. 1253-64.
- 567 21. Esue, O., D. Wirtz, and Y. Tseng, *GTPase activity, structure, and mechanical*  
568 *properties of filaments assembled from bacterial cytoskeleton protein MreB*. J Bacteriol,  
569 2006. **188**(3): p. 968-76.
- 570 22. Loose, M. and T.J. Mitchison, *The bacterial cell division proteins FtsA and FtsZ self-*  
571 *organize into dynamic cytoskeletal patterns*. Nat Cell Biol, 2014. **16**(1): p. 38-46.
- 572 23. Erickson, H.P., *Modeling the physics of FtsZ assembly and force generation*. Proc Natl  
573 Acad Sci U S A, 2009. **106**(23): p. 9238-43.
- 574 24. Erickson, H.P., *FtsZ, a tubulin homologue in prokaryote cell division*. Trends Cell  
575 Biol, 1997. **7**(9): p. 362-7.
- 576 25. Erickson, H.P., et al., *Bacterial cell division protein FtsZ assembles into protofilament*  
577 *sheets and minirings, structural homologs of tubulin polymers*. Proc Natl Acad Sci U S  
578 A, 1996. **93**(1): p. 519-23.
- 579 26. Zheng, X., K. Diraviyam, and D. Sept, *Nucleotide effects on the structure and*  
580 *dynamics of actin*. Biophys J, 2007. **93**(4): p. 1277-83.
- 581 27. Chu, J.W. and G.A. Voth, *Allostery of actin filaments: molecular dynamics simulations*  
582 *and coarse-grained analysis*. Proc Natl Acad Sci U S A, 2005. **102**(37): p. 13111-6.

- 583 28. Hsin, J., A. Gopinathan, and K.C. Huang, *Nucleotide-dependent conformations of*  
584 *FtsZ dimers and force generation observed through molecular dynamics simulations.*  
585 *Proc Natl Acad Sci U S A*, 2012. **109**(24): p. 9432-7.
- 586 29. Li, Y., et al., *FtsZ protofilaments use a hinge-opening mechanism for constrictive force*  
587 *generation.* *Science*, 2013. **341**(6144): p. 392-5.
- 588 30. Martín-García, F., et al., *Comparing Molecular Dynamics Force Fields in the Essential*  
589 *Subspace.* *PLoS ONE*, 2015. **10**(3): p. e0121114.
- 590 31. Best, R.B., et al., *Optimization of the additive CHARMM all-atom protein force field*  
591 *targeting improved sampling of the backbone phi, psi and side-chain chi(1) and chi(2)*  
592 *dihedral angles.* *J Chem Theory Comput*, 2012. **8**(9): p. 3257-3273.
- 593 32. Pfaendtner, J., et al., *Structure and Dynamics of the Actin Filament.* *Journal of*  
594 *Molecular Biology*, 2010. **396**(2): p. 252-263.
- 595 33. Gayathri, P., et al., *Structure of the ParM filament at 8.5Å resolution.* *J Struct Biol*,  
596 2013. **184**(1): p. 33-42.
- 597 34. Braun, T., et al., *Archaeal actin from a hyperthermophile forms a single-stranded*  
598 *filament.* *Proc Natl Acad Sci U S A*, 2015. **112**(30): p. 9340-5.
- 599 35. Jensen, R.B. and K. Gerdes, *Partitioning of plasmid R1. The ParM protein exhibits*  
600 *ATPase activity and interacts with the centromere-like ParR-parC complex.* *J Mol Biol*,  
601 1997. **269**(4): p. 505-13.



- 602 36. Kunzelmann, S. and M.R. Webb, *A fluorescent, reagentless biosensor for ADP based*  
603 *on tetramethylrhodamine-labeled ParM*. ACS Chem Biol, 2010. **5**(4): p. 415-25.
- 604 37. Beuria, T.K., et al., *Adenine nucleotide-dependent regulation of assembly of bacterial*  
605 *tubulin-like FtsZ by a hypermorph of bacterial actin-like FtsA*. J Biol Chem, 2009.  
606 **284**(21): p. 14079-86.
- 607 38. Szwedziak, P., et al., *FtsA forms actin-like protofilaments*. EMBO J, 2012. **31**(10): p.  
608 2249-60.
- 609 39. English, C.A., et al., *The Hsp70 interdomain linker is a dynamic switch that enables*  
610 *allosteric communication between two structured domains*. J Biol Chem, 2017. **292**(36):  
611 p. 14765-14774.
- 612 40. Morgenstein, R.M., et al., *RodZ links MreB to cell wall synthesis to mediate MreB*  
613 *rotation and robust morphogenesis*. Proc Natl Acad Sci U S A, 2015. **112**(40): p.  
614 12510-5.
- 615 41. Bendezu, F.O., et al., *RodZ (YfgA) is required for proper assembly of the MreB actin*  
616 *cytoskeleton and cell shape in E. coli*. EMBO J, 2009. **28**(3): p. 193-204.
- 617 42. Dai, K. and J. Lutkenhaus, *The proper ratio of FtsZ to FtsA is required for cell division*  
618 *to occur in Escherichia coli*. J Bacteriol, 1992. **174**(19): p. 6145-51.
- 619 43. Dye, N.A., et al., *Mutations in the nucleotide binding pocket of MreB can alter cell*  
620 *curvature and polar morphology in Caulobacter*. Mol Microbiol, 2011. **81**(2): p. 368-94.

- 621 44. Shi, H., et al., *Deep phenotypic mapping of bacterial cytoskeletal mutants reveals*  
622 *physiological robustness to cell size*. *Current Biology*, 2017.
- 623 45. Popp, D., et al., *Protofilament formation of ParM mutants*. *J Mol Biol*, 2009. **388**(2): p.  
624 209-17.
- 625 46. Pichoff, S., et al., *FtsA mutants impaired for self-interaction bypass ZipA suggesting a*  
626 *model in which FtsA's self-interaction competes with its ability to recruit downstream*  
627 *division proteins*. *Mol Microbiol*, 2012. **83**(1): p. 151-67.
- 628 47. Geissler, B., D. Elraheb, and W. Margolin, *A gain-of-function mutation in ftsA*  
629 *bypasses the requirement for the essential cell division gene zipA in Escherichia coli*.  
630 *Proc Natl Acad Sci U S A*, 2003. **100**(7): p. 4197-202.
- 631 48. Gayda, R.C., M.C. Henk, and D. Leong, *C-shaped cells caused by expression of an*  
632 *ftsA mutation in Escherichia coli*. *J Bacteriol*, 1992. **174**(16): p. 5362-70.
- 633 49. Phillips, J.C., et al., *Scalable molecular dynamics with NAMD*. *J. Comput. Chem.*,  
634 2005. **26**(16): p. 1781-802.
- 635 50. Mackerell, A.D., Jr., M. Feig, and C.L. Brooks, 3rd, *Extending the treatment of*  
636 *backbone energetics in protein force fields: limitations of gas-phase quantum mechanics*  
637 *in reproducing protein conformational distributions in molecular dynamics simulations*.  
638 *J. Comput. Chem.*, 2004. **25**(11): p. 1400-15.

- 639 51. Jorgensen, J.H., et al., *Comparison of automated and rapid manual methods for the*  
640 *same-day identification of Enterobacteriaceae*. Am. J. Clin. Pathol., 1983. **79**(6): p. 683-  
641 7.
- 642 52. Tuckerman, M., B.J. Berne, and G.J. Martyna, *Reversible multiple time scale*  
643 *molecular dynamics*. J. Chem. Phys., 1992. **97**(3): p. 1990-2001.
- 644 53. Brünger, A., C.L. Brooks, and M. Karplus, *Stochastic boundary conditions for*  
645 *molecular dynamics simulations of ST2 water*. Chem Phys Lett, 1984. **105**(5): p. 495-  
646 500.
- 647 54. Feller, S.E., et al., *Constant pressure molecular dynamics simulation: the Langevin*  
648 *piston method*. J. Chem. Phys., 1995. **103**(11): p. 4613-4621.
- 649 55. Humphrey, W., A. Dalke, and K. Schulten, *VMD: visual molecular dynamics*. J.  
650 Mol. Graph., 1996. **14**(1): p. 33-38, 27-28.

651
